# Supplementary material for: The proof is in the pudding: patient engagement in studying cannabidiol in mild cognitive impairment
Source: Springer Nature journal article supplement (doi:10.1186/s12906-025-04753-w), 2025-01-22

**Figure 1**

*Relevance of clinical outcomes as evaluated by participants (N = 88)*

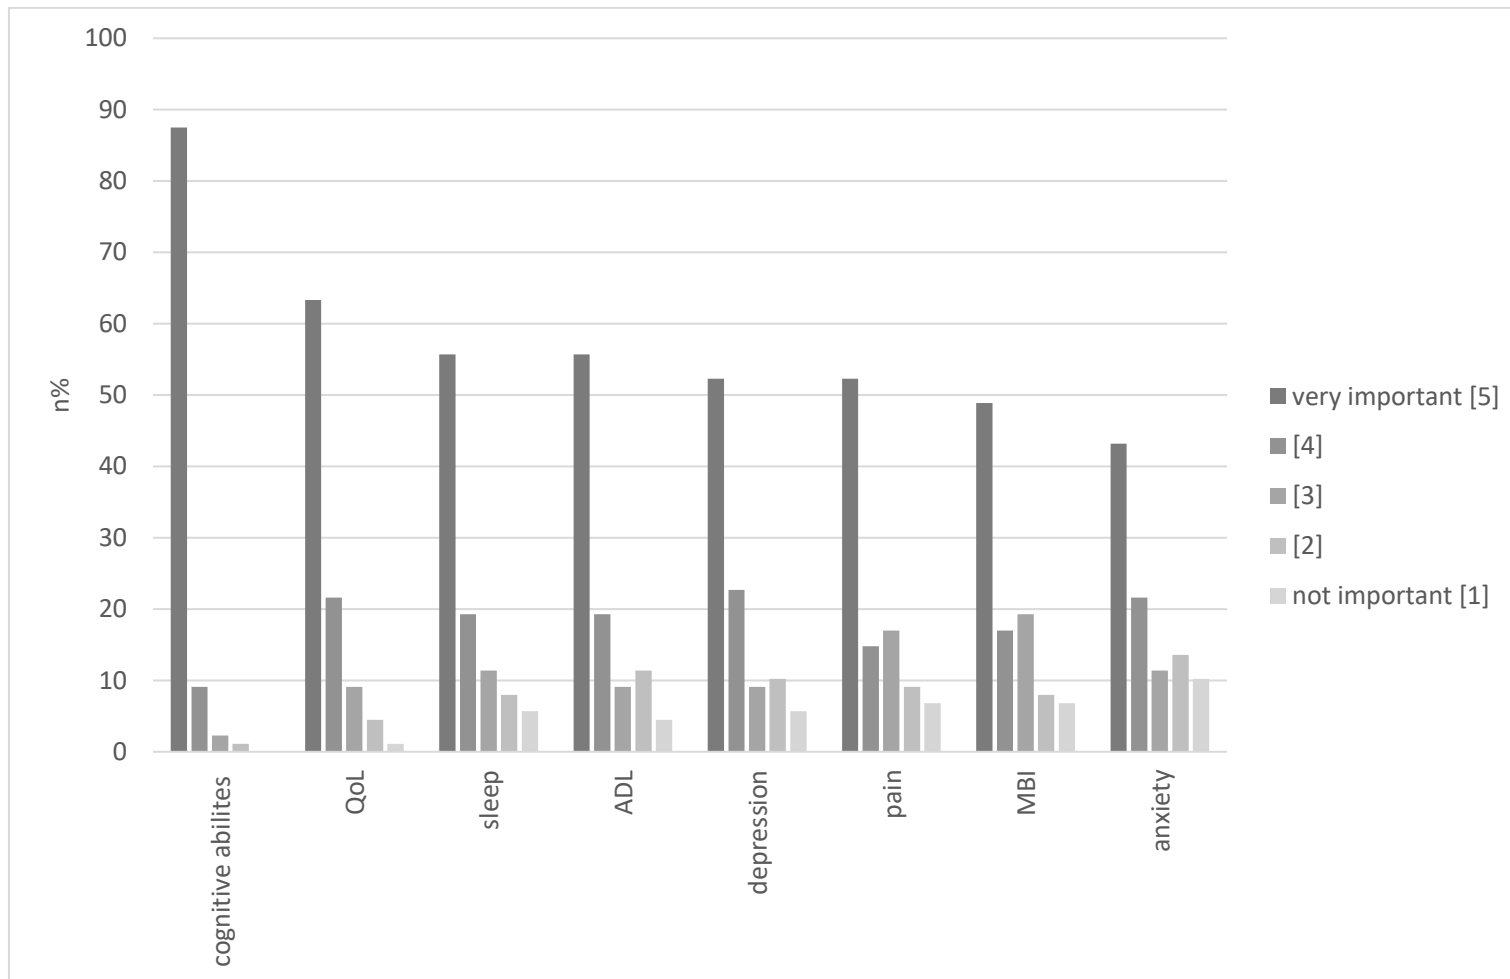

*Note.* ADL = Activities of daily living; MBI = Mild behavioral impairment; QoL = Quality of life.

**Figure 2**

*Non-acceptance of adverse events of cannabidiol (CBD) as evaluated by participants (N = 88)*

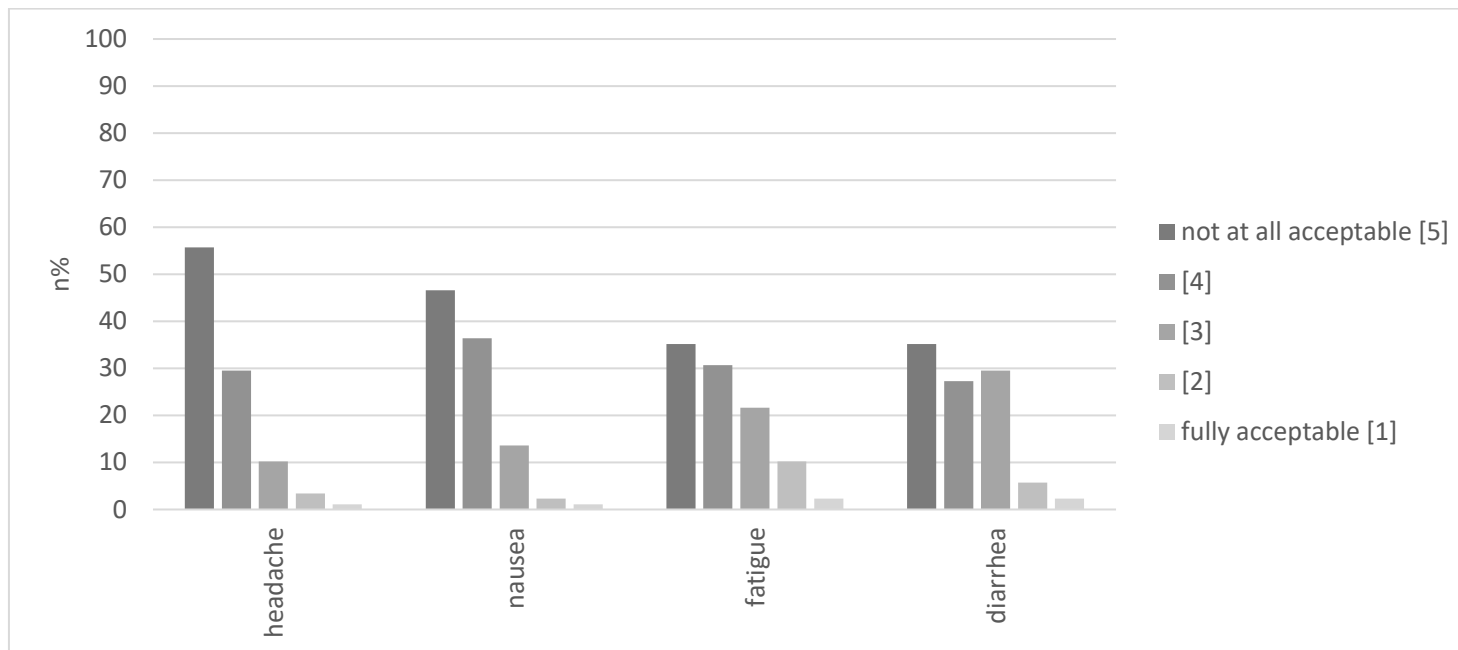

**Figure 3**

*Frequency of probable discontinuation of the study depending on side effects of cannabidiol (CBD) as evaluated by participants (N = 88)*

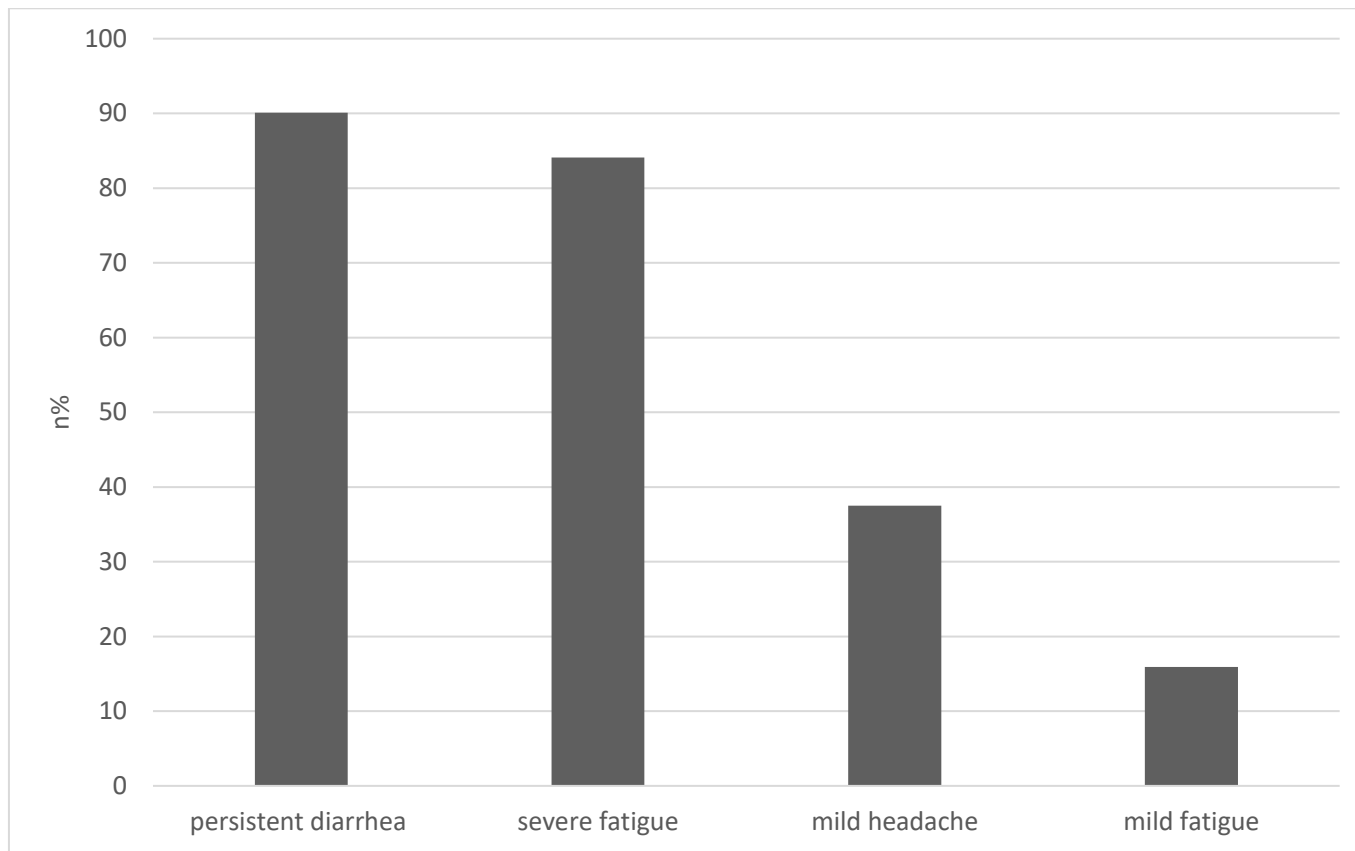

Supplement: MOESM2 [file 12906_2025_4753_MOESM2_ESM.pdf]
